# Supplementary material for: PEGylation within a confined hydrophobic cavity of a protein
Source: Royal Society of Chemistry journal article supplement (doi:10.1039/c9cp04387j), 2019-01-01
Supplement: c9cp04387j1.pdf [file c9cp04387j1.pdf]

## Supplementary Information for PEGylation within a Confined Hydrophobic Cavity of a Protein

Aravinda Munasinghe<sup>1,4,5</sup>, Akshay Mathavan<sup>1,2,4</sup>, Akash Mathavan<sup>1,2,4</sup>, Ping Lin<sup>1,4,5</sup> and  
Coray M. Colina<sup>1,3,4,5,\*</sup>

<sup>1</sup>Department of Chemistry, <sup>2</sup>Department of Biomedical Engineering, <sup>3</sup>Department of  
Materials Science and Engineering, <sup>4</sup>George & Josephine Butler Polymer Research  
Laboratory, and <sup>5</sup>Center for Macromolecular Science & Engineering, University of  
Florida, Gainesville, Florida 32611, United States

\*Corresponding author: Email: [colina@chem.ufl.edu](mailto:colina@chem.ufl.edu), Phone: +1 (352) 294-3488

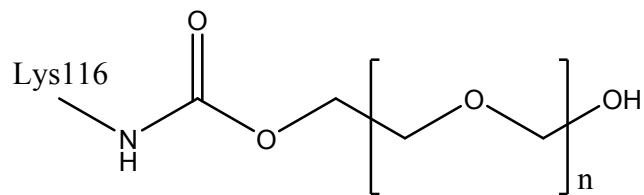

**Figure S1.** Schematic of carbamate linker attaching PEG chain to BSA's K116 residue. For 2, 5, 10, and 20 kDa K116 PEGylated BSA systems, corresponding repeating unit numbers for the PEG polymer were  $n = 45, 113, 227,$  and  $454$ .

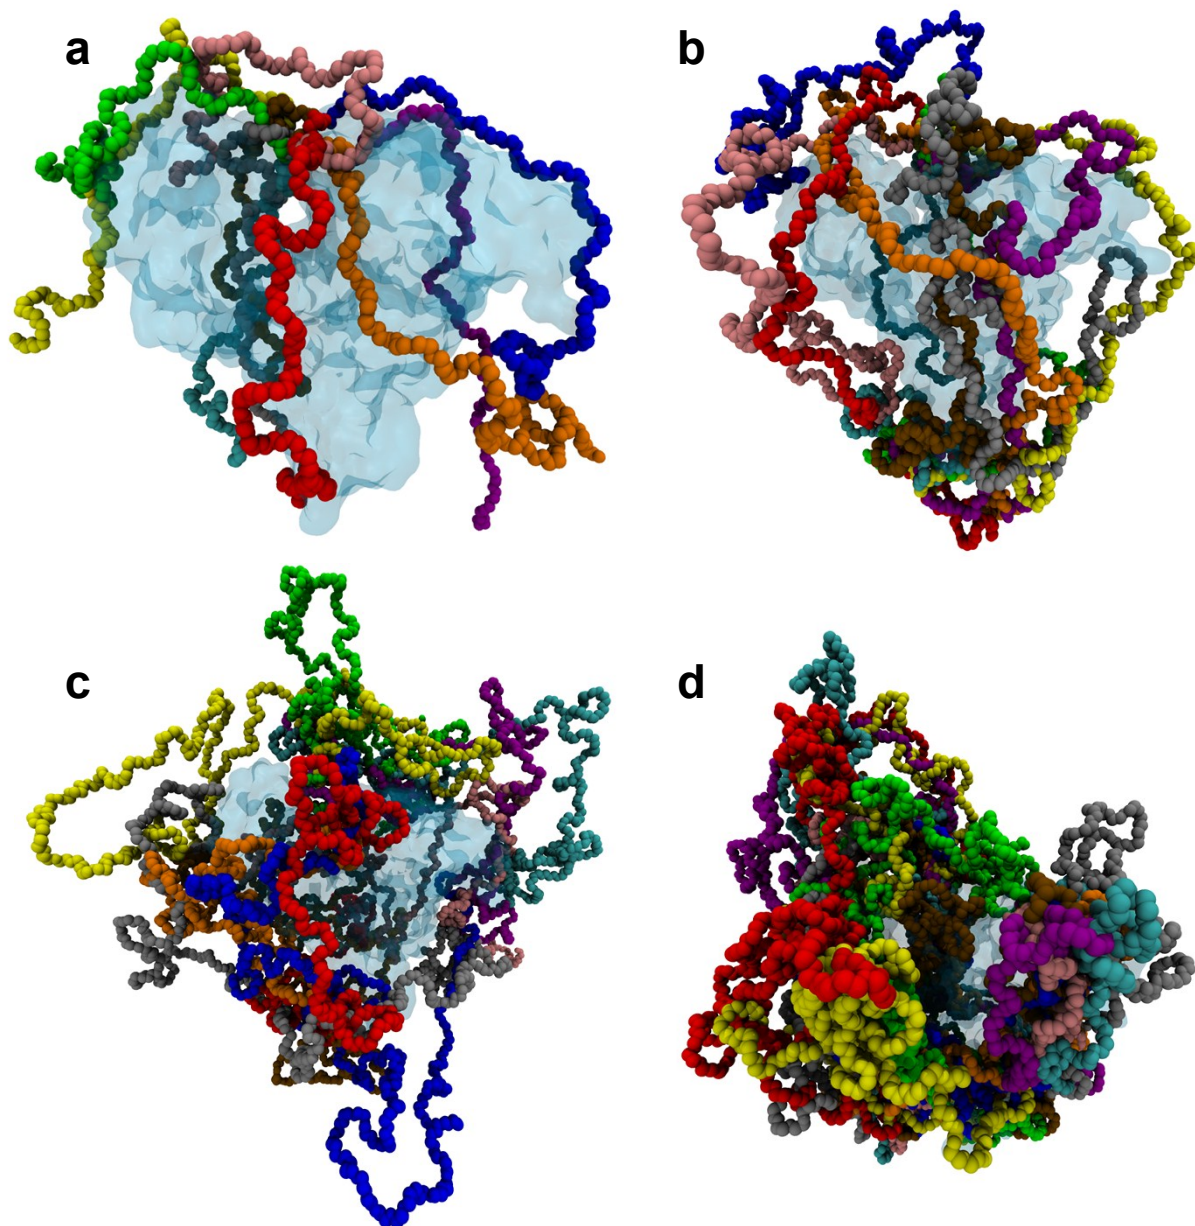

**Figure S2.** Superimposed initial equilibrated PEG conformations for 2 (a), 5 (b), 10 (c), and 20 (d) kDa K116 PEGylated BSA conjugates. PEG chains are colored according to sim IDs 1-10 as follows: blue, red, orange, yellow, green, cyan, purple, pink, brown, and gray.

PEG shape can be estimated using geometrical analysis by comparing the sum of the radius of gyration,  $R_g$ , of free protein and of free PEG to the distance between centers of mass of protein and PEG in PEGylated conjugates ( $D_{PEG,BSA}^{COM}$ ). However, the conjugation site in K116 PEGylated conjugates is located within the volume defined by the  $R_g$  of the free BSA, which may bias this analysis toward indicating shroud-like conformations. To reduce this bias, a correction factor was calculated and added to measured  $D_{PEG,BSA}^{COM}$  values. The  $R_g$  of the free BSA was calculated and shown to be a consistent value of  $27.5 \pm 0.3 \text{ \AA}$ . The distance between the center of mass of the BSA and the C $\alpha$  atom of K116 was measured and shown to be  $24.0 \pm 1.6 \text{ \AA}$ . The correction factor was defined as the difference between these two values ( $3.5 \text{ \AA}$ ) and added to measured  $D_{PEG,BSA}^{COM}$  averages for K116 PEGylated systems, effectively “moving” the conjugation site to the edge of the spherical volume generated by the free BSA’s  $R_g$  and reducing initial bias toward results indicating shroud-like conformations.

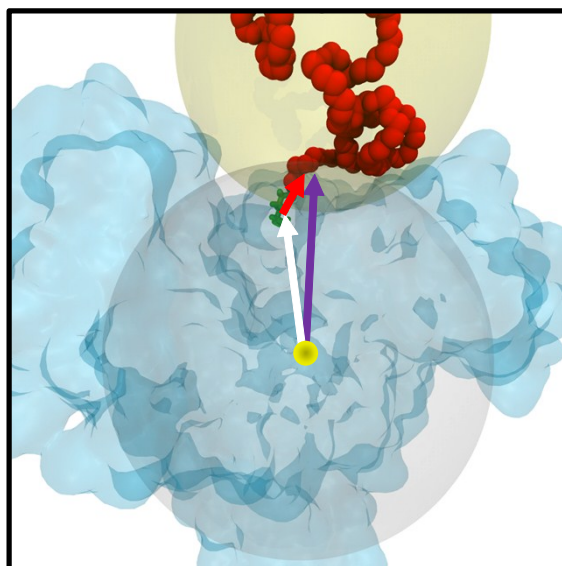

**Figure S3.** Generation of correction factor for K116 PEGylated BSA conjugate PEG chain shape analysis. Volumes generated by radii of gyration ( $R_g$ ) of the free BSA and free PEG are represented as gray and yellow spheres, respectively. PEG atoms are shown as red van der Waals spheres and K116 is presented as a green licorice model. The purple arrow denotes the free BSA  $R_g$ , the white arrow denotes distance from BSA’s center of mass to C $\alpha$  of K116, and the red arrow denotes the correction factor.

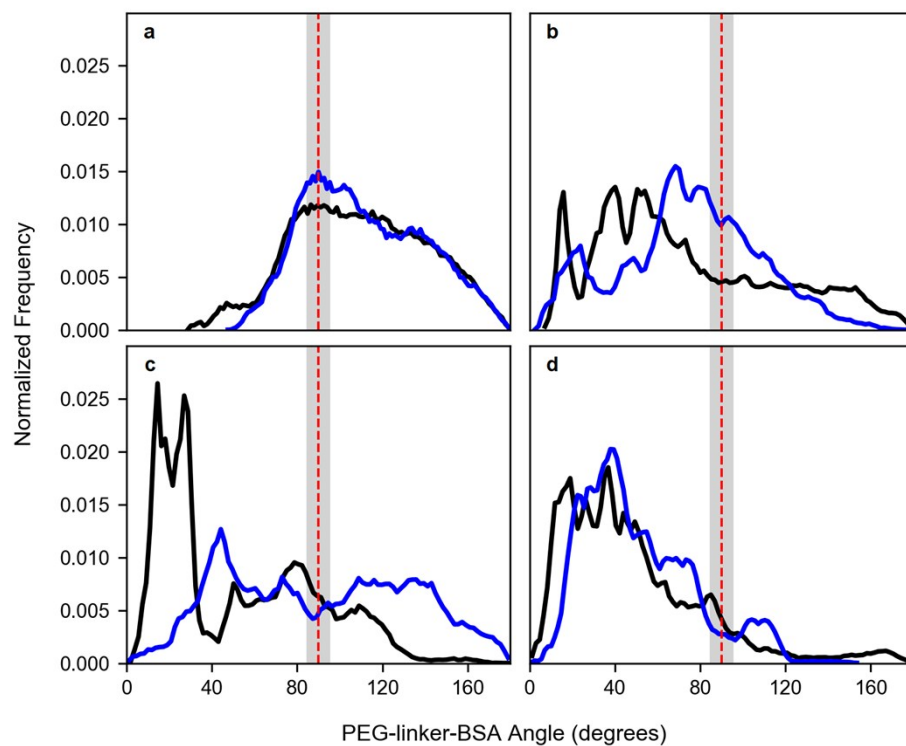

**Figure S4.** Frequency distribution of the angle between the centers of mass of the PEG chain, linker, and BSA, denoted  $\theta$ , for ten simulations of 2 (a), 5 (b), 10 (c), and 20 (d) kDa PEGylated BSA conjugates for both N-terminal (black line) and K116 (blue line) grafting sites. Transition regime is demarcated by 90° (red line), with gray boundaries indicating  $\pm 5^\circ$ .

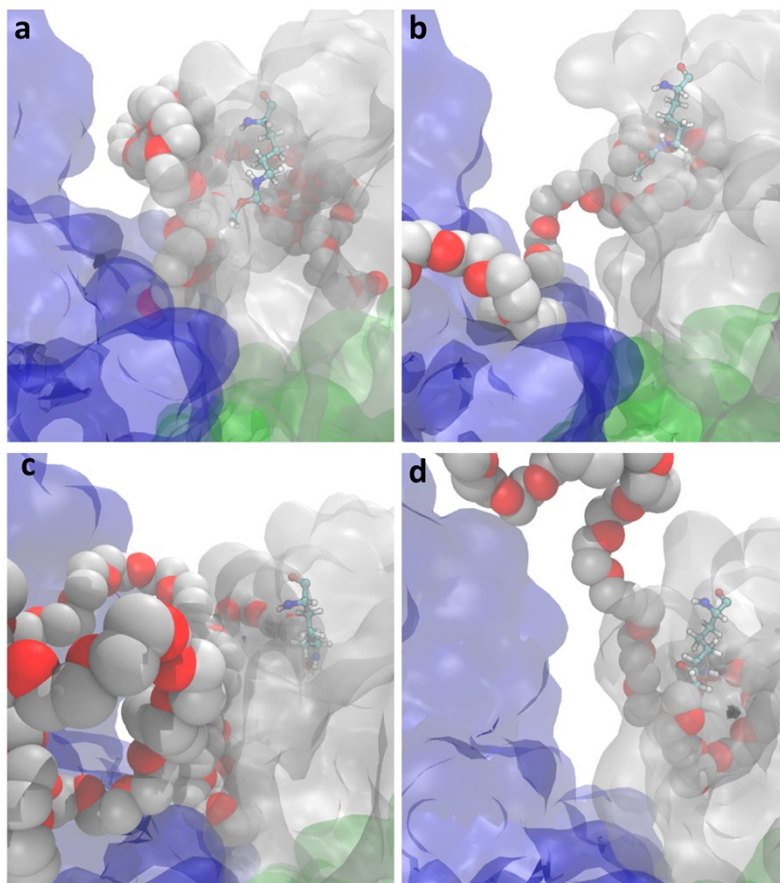

**Figure S5.** A snapshot showing the inward orientation of K116 and the carbamate linker (highlighted CPK representation) for (a) 2, (b) 5, (c) 10, and (d) 20 kDa PEGylated systems. PEG oxygen and carbon atoms are shown as red and gray van der Waals spheres, respectively. The BSA is partitioned into domain I (gray), domain II (green), and domain III (blue).

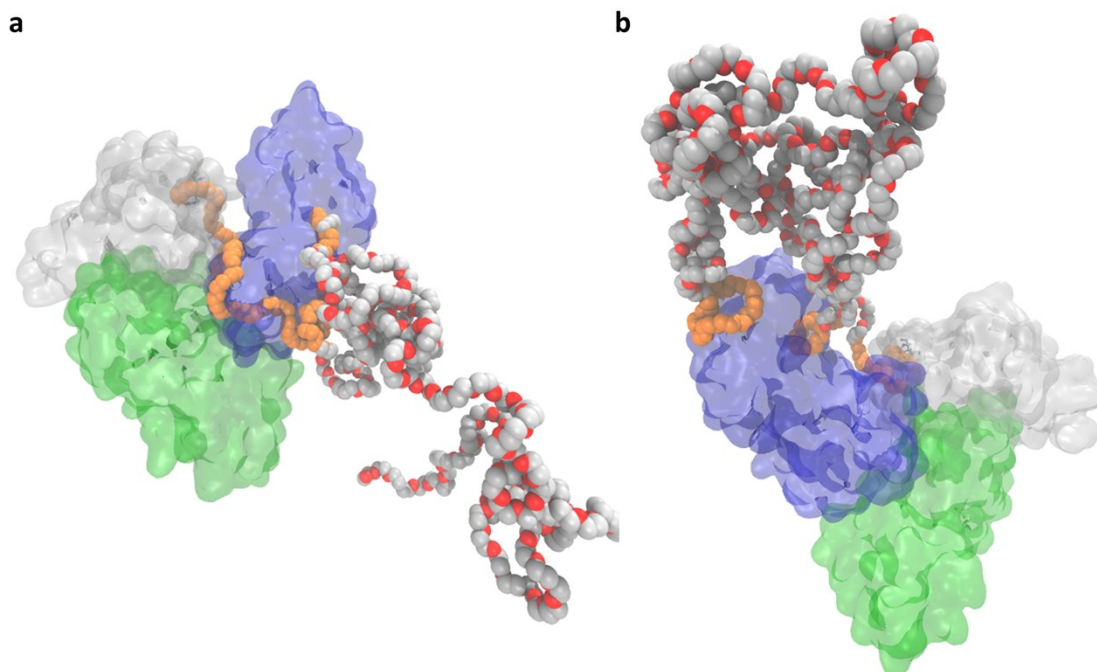

**Figure S6.** Snapshots of the two cases of (a) only the grafted end interacting with the BSA and (b) both the grafted end and the free end of the PEG chain interacting with the BSA. The BSA is partitioned into domain I (gray), domain II (green), and domain III (blue). PEG oxygen and carbon atoms are shown as red and gray van der Waals spheres, respectively, while PEG heavy atoms within 5 Å of BSA are colored orange.



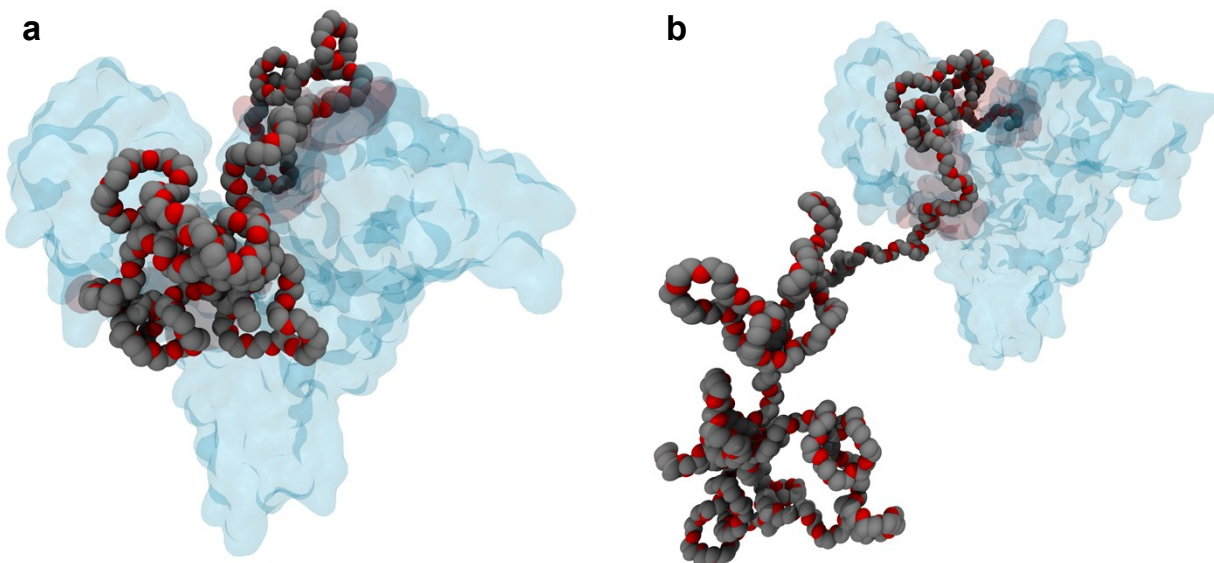

**Figure S7.** Snapshots of “wrapped” conformation of PEG chain in 5 kDa K116 PEGylated BSA conjugate (a) and partial interaction of PEG chain in 10 kDa K116 PEGylated BSA conjugate (b), with the rest of the chain protruding away from the protein. Visualizations are extracted from trajectories from sim ID 1. PEG oxygen and carbon atoms are shown as red and gray van der Waals spheres, respectively, and K116 is presented in a licorice model representation. Patches of the BSA’s surface in contact (within 5 Å) with PEG atoms are colored red.

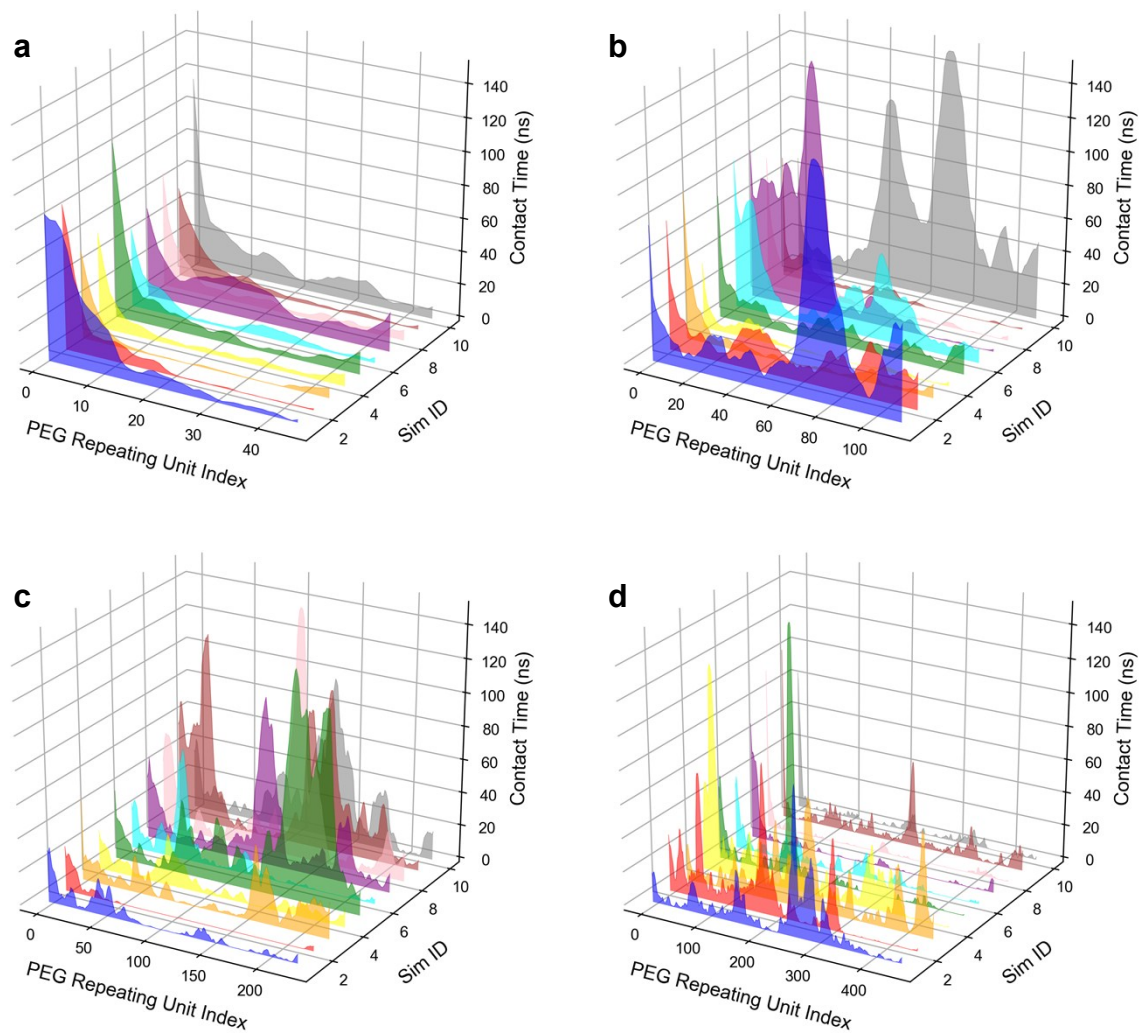

**Figure S8.** Contact time across repeating units of the grafted PEG polymer in 2 (a), 5 (b), 10 (c), and 20 (d) kDa N-terminal PEGylated BSA trajectories, where index 1 designates the repeating unit bonded to the linker. Contact time was measured for each of the ten simulations per PEG MM, referred to as “Sim ID” and colored as follows: blue, red, orange, yellow, green, cyan, purple, pink, brown, and gray.



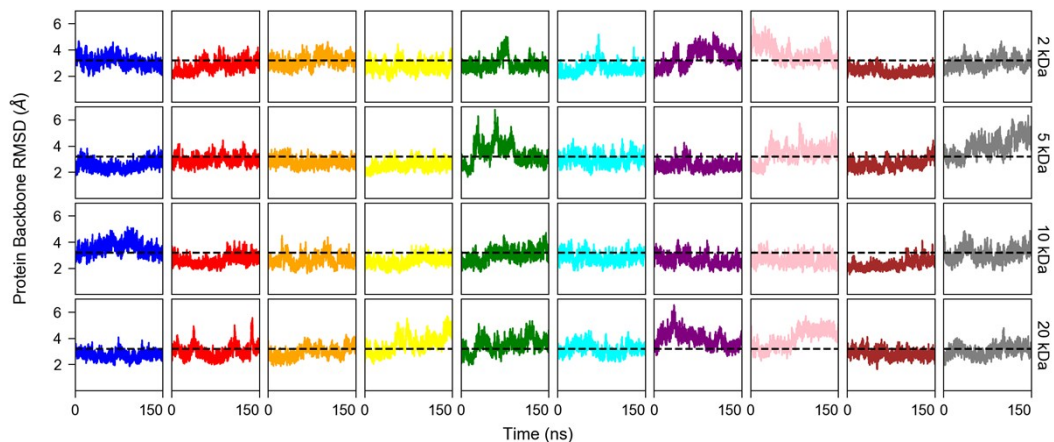

**Figure S9.** Evolution of root-mean-square-deviations (RMSDs) over time for ten simulations of K116 PEGylated BSA systems of each MM (2, 5, 10, and 20 kDa). Simulations were designated by “Sim ID” and are colored as follows: blue, red, orange, yellow, green, cyan, purple, pink, brown, and gray. The black dashed line represents the average RMSD value for the free BSA, calculated using the final 150 ns of the total 500 ns simulation time.

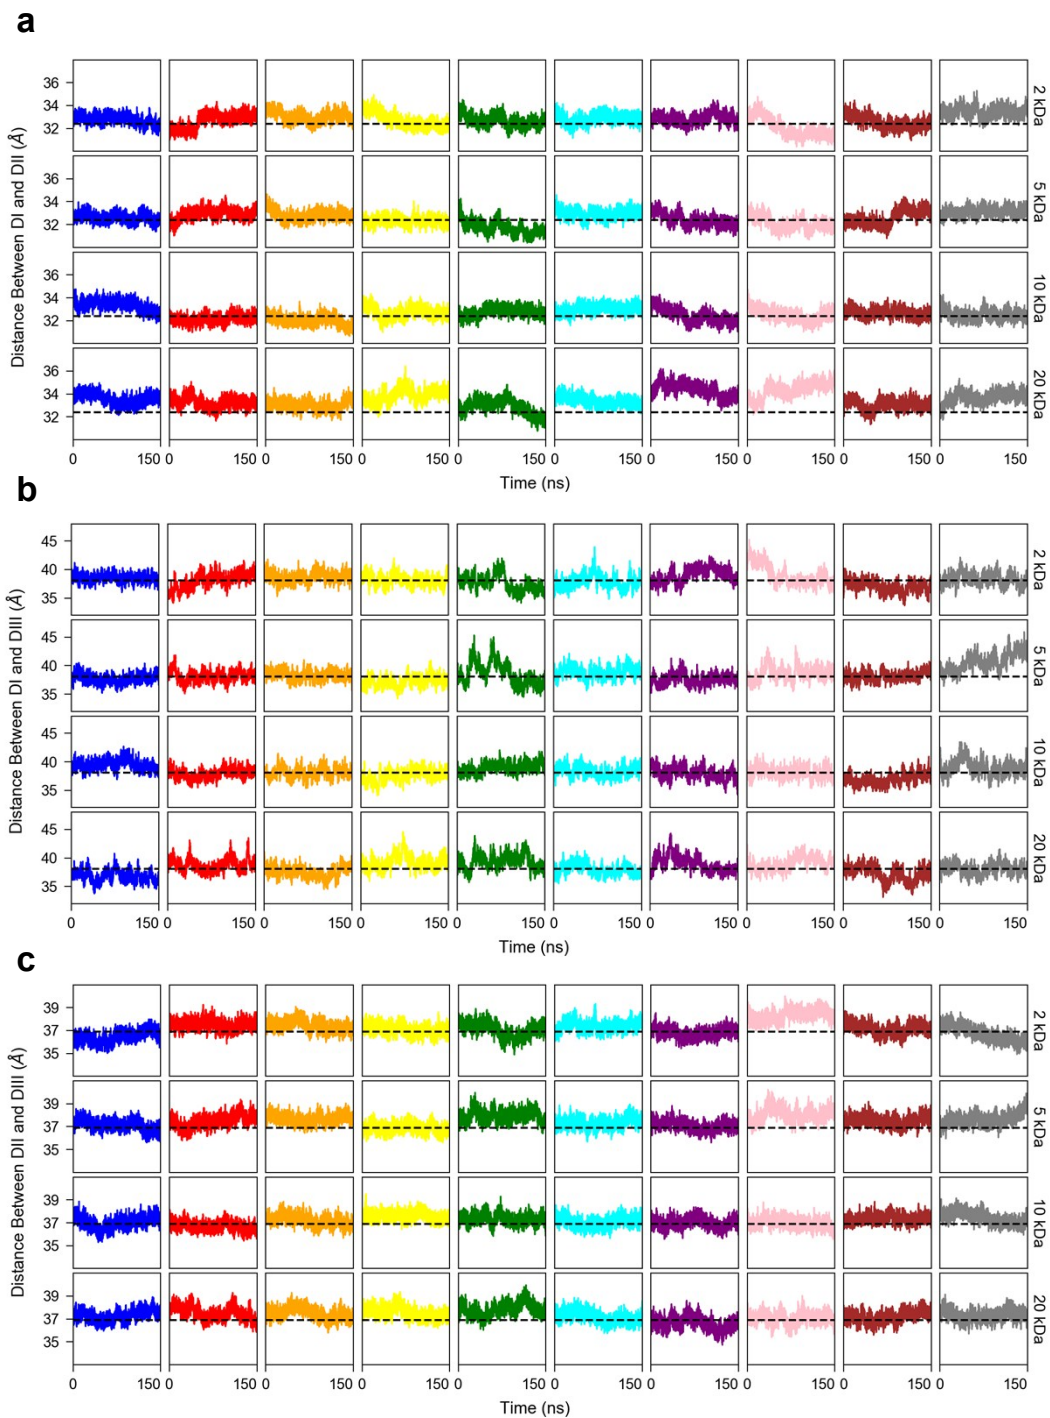

**Figure S10.** Evolution of distances between domains I & II (a), domains I & III (b), and domains II & III (c) over time for K116 PEGylated BSA systems. Simulations were designated by “Sim ID” and are colored as follows: blue, red, orange, yellow, green, cyan, purple, pink, brown, and gray. The black dashed line represents the average distance value for the free BSA, calculated using the final 150 ns of the total 500 ns simulation time.

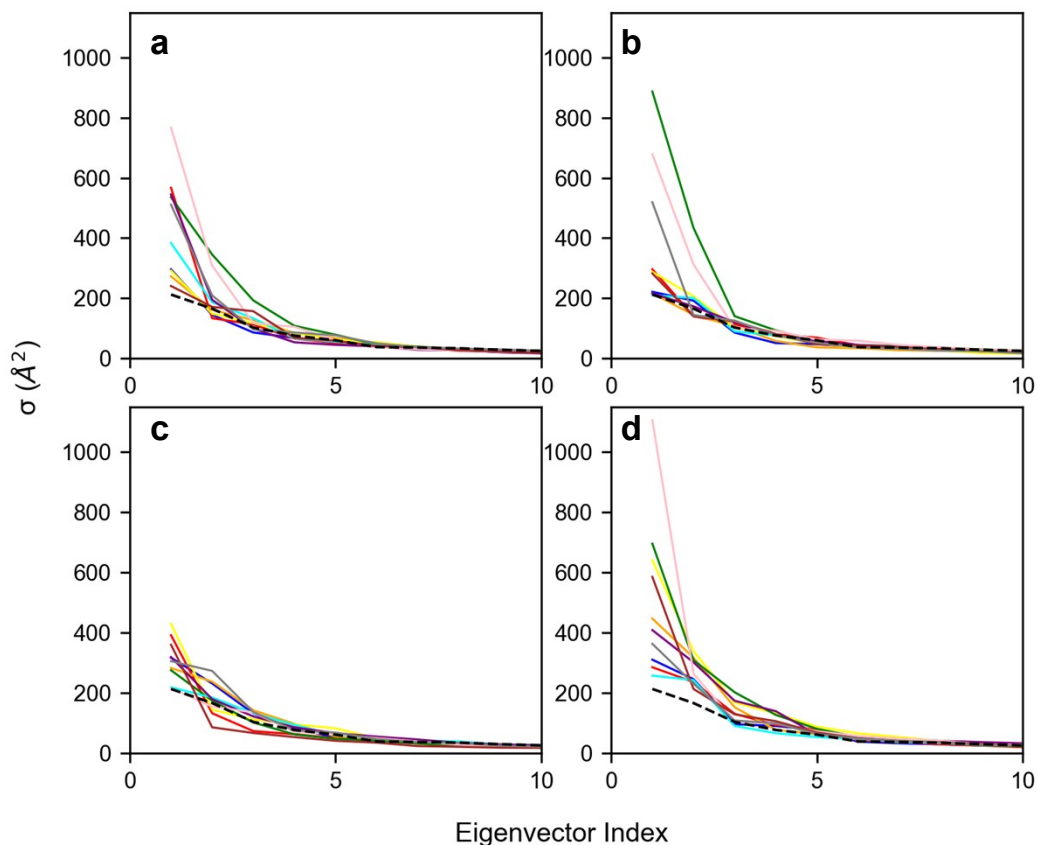

**Figure S11.** Scree plot for PCA analysis of C $\alpha$  atoms in 2 (a), 5 (b), 10 (c), and 20 (d) kDa K116 PEGylated BSA systems. Simulations were designated by “Sim ID” and are colored as follows: blue, red, orange, yellow, green, cyan, purple, pink, brown, and gray. The black dashed line represents variance values for principal components of the free BSA, calculated using the final 150 ns of the total 500 ns simulation time.

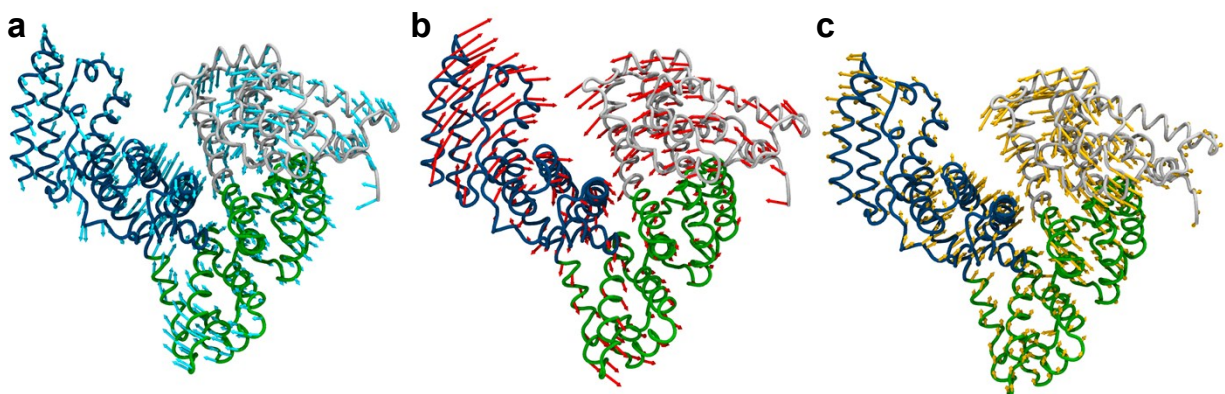

**Figure S12.** Cartoon representation of the BSA, which is partitioned into domain I (gray), domain II (green), and domain III (blue). The first three low mode vibrations are projected onto the protein, where principal components are colored as follows: correlated motions (a) as cyan arrows, anti-correlated motions (b) as red arrows, and tilt-like motions (c) as orange arrows.

**Table S1.** Simulation system sizes (number of atoms) for ten simulations, designated by “sim ID”, for 2, 5, 10, and 20 kDa K116 PEGylated BSA conjugates.

| sim ID | simulation system size (number of atoms) |        |        |        |
|--------|------------------------------------------|--------|--------|--------|
|        | 2 kDa                                    | 5 kDa  | 10 kDa | 20 kDa |
| 1      | 230295                                   | 262631 | 322417 | 356549 |
| 2      | 187585                                   | 262439 | 233607 | 356387 |
| 3      | 178273                                   | 262490 | 323403 | 356537 |
| 4      | 221849                                   | 262685 | 323352 | 356513 |
| 5      | 230508                                   | 262436 | 293041 | 356939 |
| 6      | 189875                                   | 394678 | 224735 | 355971 |
| 7      | 230337                                   | 262658 | 323148 | 356192 |
| 8      | 170935                                   | 262520 | 323187 | 356522 |
| 9      | 230478                                   | 394855 | 322548 | 356648 |
| 10     | 230475                                   | 262604 | 257312 | 356729 |

**Table S2.** Radius of gyration for free PEG, grafted PEG, sum of free PEG and free protein ( $R_s$ ), and distance between centers of mass of PEG and BSA ( $D_{PEG,BSA}^{COM}$ ) in N-terminal PEGylated BSA conjugates. Fraction of time during which PEG assumed a shroud-like conformation ( $R_s > D_{PEG,BSA}^{COM}$ ) is also reported.

| PEG MM (kDa) | average radius of gyration ( $\text{\AA}$ ) |             |            | $D_{PEG,BSA}^{COM}$ ( $\text{\AA}$ ) | shroud-like conformation (%) |
|--------------|---------------------------------------------|-------------|------------|--------------------------------------|------------------------------|
|              | free PEG                                    | grafted PEG | $R_s$      |                                      |                              |
| 2            | 15.4 (3.1)                                  | 15.4 (3.1)  | 42.9 (3.1) | 53.0 (3.4)                           | 12.2                         |
| 5            | 21.6 (4.7)                                  | 21.6 (4.7)  | 49.1 (6.0) | 44.1 (15.0)                          | 59.3                         |
| 10           | 28.6 (5.0)                                  | 28.6 (5.0)  | 56.1 (6.3) | 40.0 (13.5)                          | 81.8                         |
| 20           | 49.7 (7.4)                                  | 49.7 (7.4)  | 77.2 (8.8) | 36.4 (12.3)                          | 95.7                         |

**Table S3.** Unique residues with top twenty maximum residence times for K116 PEGylated systems of each MM. Residence time is defined as any continuous time period of contact for within any given simulation.

| 2 kDa PEG |               | 5 kDa PEG |                | 10 kDa PEG |           | 20 kDa PEG |               |
|-----------|---------------|-----------|----------------|------------|-----------|------------|---------------|
| residue   | time (ns)     | residue   | time (ns)      | residue    | time (ns) | residue    | time (ns)     |
| Lys180    | 127.6         | Leu115    | 150.0          | Arg435     | 150.0     | Lys556     | 119.4<br>88.6 |
| Arg185    | 106.4<br>57.4 | Lys116    | 150.0<br>112.2 | Cys436     | 150.0     | Asp236     | 106.9         |
| Lys114    | 95.2<br>36.3  | Lys136    | 150.0          | Lys439     | 150.0     | Lys544     | 72.2          |
| Arg144    | 94.9          | Arg185    | 147.3<br>103.2 | Arg444     | 150.0     | Phe553     | 68.9          |
| Lys116    | 54.1<br>29.4  | Phe133    | 139.4          | Arg185     | 99.2      | Leu189     | 66.4          |
| Ile181    | 42.9<br>40.0  | Ile181    | 136.9<br>79.2  | Lys544     | 99.1      | Lys204     | 65.0          |
| Tyr137    | 42.6<br>39.0  | Leu122    | 124.1          | Lys116     | 97.3      | Glu570     | 61.8          |
| Glu140    | 39.9<br>31.87 | Tyr137    | 84.8<br>58.9   | Asn404     | 95.1      | Ala193     | 60.2          |
| Ile141    | 38.6          | Lys20     | 79.4           | Pro440     | 88.5      | Leu259     | 60.1          |
| Leu115    | 34.1          | Lys523    | 74.9           | Ser442     | 81.4      | Arg185     | 58.6          |
| Leu189    | 32.2          | Val40     | 69.1           | Lys338     | 57.9      | Leu178     | 58.3          |
| Pro113    | 30.7<br>26.2  | Lys114    | 67.3           | Leu189     | 57.4      | Lys106     | 56.3          |
| Leu178    | 28.4<br>24.9  | Leu505    | 61.8           | Lys537     | 56.7      | Asn549     | 53.7          |
| Thr183    | 27.9          | Lys350    | 61.4           | Glu540     | 53.3      | Lys474     | 52.5          |
| Pro179    | 27.1          | Lys474    | 60.7           | Lys114     | 52.3      | Lys239     | 52.1          |
| Cys176    | 26.6          | Tyr160    | 55.9           | Glu443     | 50.4      | Lys114     | 48.6          |
| Val188    | 25.7          | Thr526    | 51.7           | Ser428     | 46.4      | Tyr147     | 46.9          |
| Pro572    | 24.7          | Asn482    | 49.9           | Ala405     | 45.1      | Lys375     | 46.7          |
| Tyr160    | 22.8          | Phe508    | 38.9           | Lys474     | 42.2      | Lys180     | 46.6          |
| Met184    | 21.2          | Cys486    | 38.5           | Met547     | 40.6      | Leu397     | 44.3          |

**Table S4.** Average values for root-mean-square-deviations (RMSDs) in free BSA and K116 PEGylated BSA systems. For free BSA, the final 150 ns of the total 500 ns simulation time was used for analysis.

| system   | RMSD (Å)  |           |           |            |
|----------|-----------|-----------|-----------|------------|
|          | backbone  | domain I  | domain II | domain III |
| Free BSA | 3.2 (0.3) | 2.3 (0.2) | 1.9 (0.2) | 2.0 (0.2)  |
| 2 kDa    | 3.0 (0.6) | 1.9 (0.2) | 1.3 (0.2) | 1.9 (0.3)  |
| 5 kDa    | 3.0 (0.7) | 1.8 (0.2) | 1.3 (0.2) | 1.8 (0.2)  |
| 10 kDa   | 2.8 (0.5) | 1.8 (0.2) | 1.2 (0.2) | 1.8 (0.3)  |
| 20 kDa   | 3.3 (0.7) | 1.9 (0.3) | 1.9 (0.4) | 1.8 (0.2)  |
